# Psychiatric Services

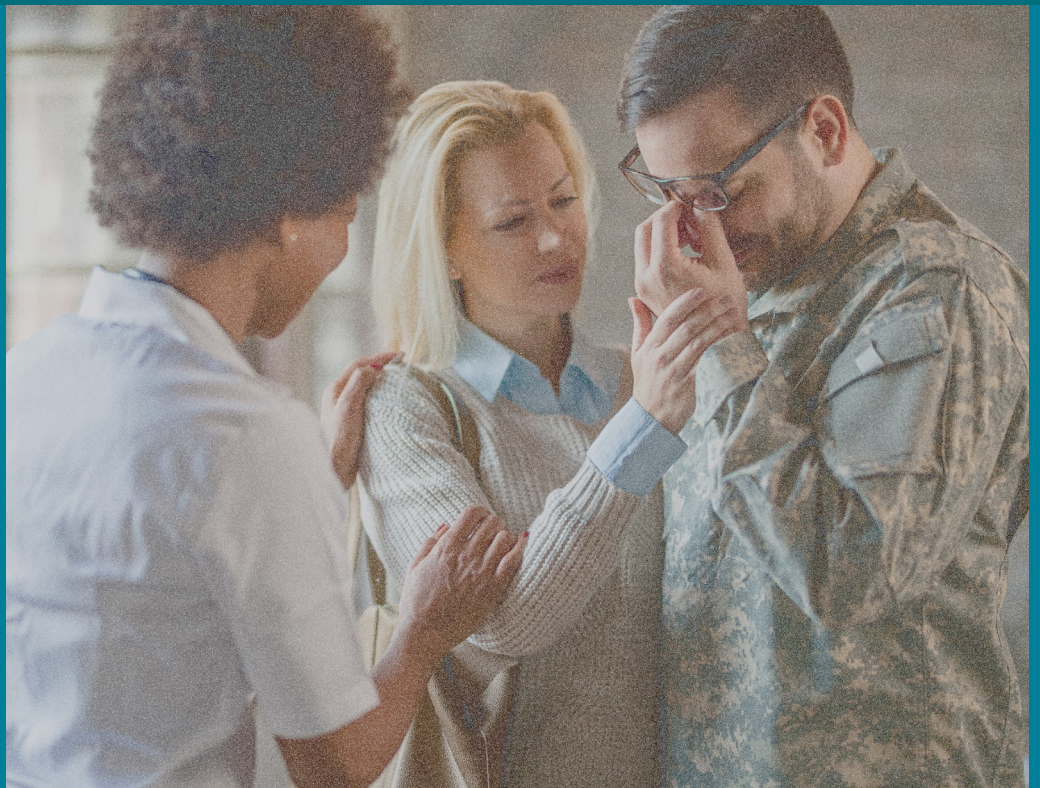

PTSD responsive to interpersonal psychotherapy for veterans and their families

Treatment gaps in rural behavioral health care: 2 reports

Deepening system engagement among mental health service users

Interpersonal counseling training for Black clergy: path to depression treatment
